# Supplementary material for: Improving peroxymonosulfate activation by copper ion-saturated adsorbent-based single atom catalysts for the degradation of organic contaminants: electron-transfer mechanism and the key role of Cu single atoms
Source: Royal Society of Chemistry journal article supplement (doi:10.1039/d1ta02237g), 2021-01-01
Supplement: d1ta02237g1.pdf [file d1ta02237g1.pdf]

## Supporting Information

Improving peroxymonosulfate activation by copper ions  
saturated adsorbent-based single atom catalysts for organic  
contaminants degradation: Electron-transfer mechanism and key role  
of Cu single-atoms

Jingwen Pan, Baoyu Gao\*, Pijun Duan, Kangying Guo, Muhammad Akram, Xing Xu,

Qinyan Yue, Yue Gao\*\*

Shandong Key Laboratory of Water Pollution Control and Resource Reuse, School of  
Environmental Science and Engineering, Shandong University, Qingdao 266237, PR China

Text: 4; Figure: 13; Table: 5.

---

\*Corresponding author: E-mail: [bygao@sdu.edu.cn](mailto:bygao@sdu.edu.cn) (B. Y. Gao)

\*\* Corresponding author: E-mail: [gaoyue0322@aliyun.com](mailto:gaoyue0322@aliyun.com) (Y. Gao)

**Text S1** Fabrication of Cu@NBC/PSF membrane

The 15 mg of 3SACu@NBC powders were deposited on PSF membranes by direct filtration of 3SACu@NBC suspension liquid and heated at 60 °C for 2 h. The effective membrane area was 49 cm<sup>2</sup>. The membranes should be prewetted with deionized water before using, and placed in the dead-end ultrafiltration cell. At a predetermined time, the effluent was collected to quantify the pollutant removal efficiency.

## **Text S2** Characterization

X-ray diffraction (XRD) patterns were acquired on an X-ray powder diffraction (XRD, Rigaku Ultima IV, Japan). X-ray photoelectron spectroscopy (XPS) of samples were analyzed using Multifunctional imaging electron spectrometer (Thermo ESCALAB 250XI, US). The surface areas (SA) of Cu-Fe@BRC was recorded on a Micrometrics Tristar 3000 using the Brunauer-Emmett-Teller (BET) N<sub>2</sub> adsorption-desorption method. X-ray absorption spectroscopy (XAS) of Cu edge was performed on Taiwan Synchrotron Irradiation Facility with stored electron energy of 3 GeV to obtain fine structure information of SACu@NBC. High-angle annular dark-field scanning transmission electron microscopy (HAADF-STEM) were carried out on FEI Themis Z, Titan Cubed Themis G2300. Cu content in SACu@NBC was characterized by ICP-OES (Agilent 5110). Electron paramagnetic resonance (EPR) spectrometer (Bruker A300, Germany) was employed to probe the radicals generated in PMS activation process. In-situ Raman was performed on Thermo DXR3xi Raman Imaging Microscope. The degradation intermediates were identified by a high-performance liquid chromatography-mass spectrometry (HPLC-MS, maXis, Bruker Co., USA).

### Text S3 Electrochemical measurement.

CV was performed between  $-0.1$  V and  $+1.0$  V at a scan rate of  $10$  mV  $s^{-1}$  using an electrochemical workstation. The experiments were conducted in  $20$  mM phosphate buffer solution (PBS) and  $0.05$  mM PCs with a three-electrode-cell configuration including a working electrode ( $20 \times 20 \times 1$  mm of graphite plate), a counter electrode (platinum electrode), and a reference electrode (saturated calomel electrode, SCE). Half-wave potentials ( $\phi_{1/2}$ ) were calculated by eq. S1 and eq. S2 in the irreversible and reversible systems, respectively:

$$\phi_{1/2} = \frac{1}{2}(E_p + E_{p/2}) \quad \text{S1}$$

where  $E_p$  and  $E_{p/2}$  are the peak potential and half-peak potential (potential of half the peak current), respectively.

$$\phi_{1/2} = \frac{1}{2}(E_{pa} + E_{pc}) \quad \text{S2}$$

where  $E_{pa}$  and  $E_{pc}$  are anodic peak potential and cathodic peak potential, respectively.

Open circuit potential was monitored by chronopotentiometry analysis, which were conducted at room temperature in a standard three-electrode electrochemical cell with an Ag/AgCl (4 M KCl) reference electrode, a platinum wire counter electrode and a catalyst-modified glassy carbon working electrode ( $0.196$  cm<sup>2</sup>, Pine Research Instrumentation, USA). The system can also measure the potential variations at the electrode with the addition of PMS or/and BPA with  $20$  mM boratory buffer solution as supporting electrolyte.

**Text S4** Density functional theory (DFT) calculation.

Density functional theory calculations are performed using the projector augmented wave method and a plane-wave basis set as implemented in the Vienna ab-initio simulation package. The Perdew-Burke-Ernzerhof functional for the exchange-correlation term is used for all calculations. The energy cutoff for the plane wave basis set is set to be 400 eV. The lattice constant of N-doped graphene with or without Cu is constructed to be  $a=12.30 \text{ \AA}$  and  $b =12.30 \text{ \AA}$ . The vacuum thickness is set to be  $15 \text{ \AA}$  along the z direction. A Monkhorst-Pack ( $3 \times 3 \times 1$ ) k-point is used to sample the Brillouin zone. The electronic energy was considered self-consistent when the energy change was smaller than  $10^{-6}$  eV. The supercell box is fixed and all atoms are allowed to fully relax until the residual force per atom is less than  $0.01 \text{ eV \AA}^{-1}$ .

The formation energy ( $E_{\text{form}}$ )<sup>1</sup> of an Cu atom on N-doped graphene was defined as:

$$E_{\text{form}} = E_{\text{Cu-surf}} - E_{\text{surf}} - E_{\text{Cu}} \quad \text{S3}$$

where  $E_{\text{Cu-surf}}$  and  $E_{\text{surf}}$  are the energy of the N-doped graphene with Cu atom and without Cu atom, and the  $E_{\text{Cu}}$  are the energy of a Cu atom in bulk Cu structure.

The adsorption energy ( $E_{\text{ads}}$ )<sup>2</sup> of an adsorbate  $\text{HSO}_5^-$  was defined as:

$$E_{\text{ads}} = E_{\text{HSO}_5^-/\text{surf}} - E_{\text{surf}} - E_{\text{HSO}_5^-} \quad \text{S4}$$

where  $E_{\text{HSO}_5^-/\text{surf}}$ ,  $E_{\text{surf}}$  and  $E_{\text{HSO}_5^-}$  are the energy of  $\text{HSO}_5^-$  adsorbed on the surface, the energy of the clean surface, and the energy of  $\text{HSO}_5^-$  in a  $15 \times 15 \times 15 \text{ \AA}^3$  box, respectively.

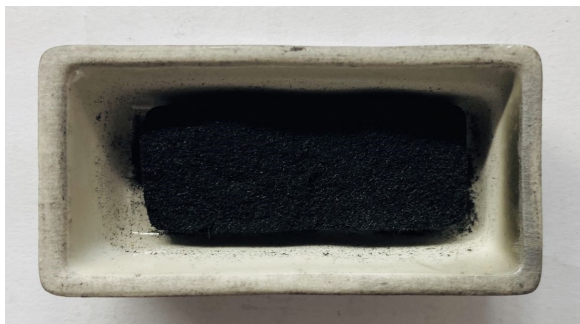

Fig. S1 The Morphology photo of catalyst after pyrolysis.

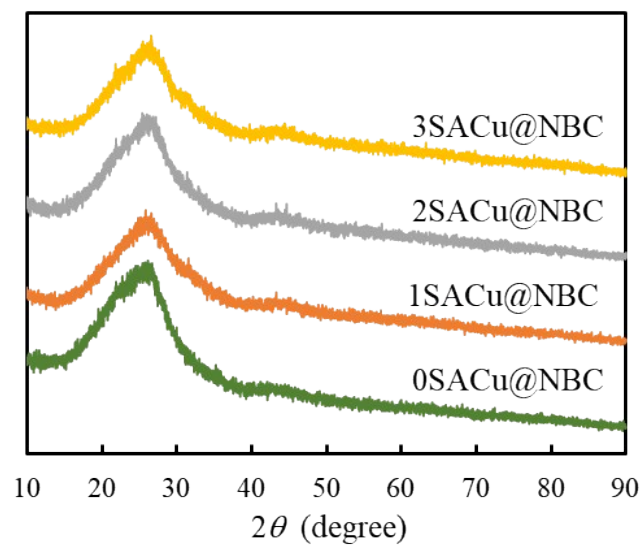

Fig. S2 Wide-angle XRD patterns for the samples of SACu0@NBC, SACu10@NBC, SACu20@NBC and SACu30@NBC.

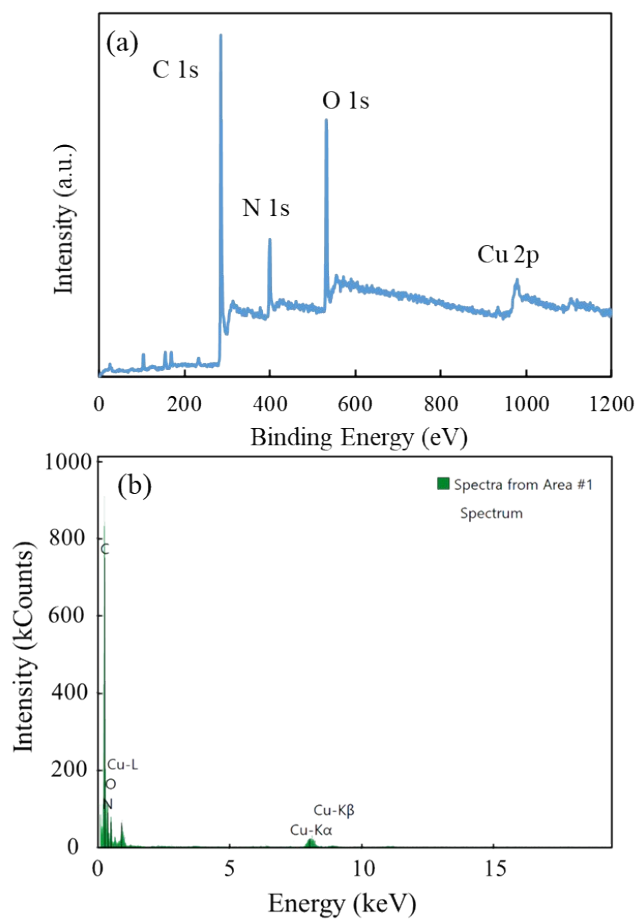

Fig. S3 (a) Full scan XPS spectra and (b) EDX spectrum of 3SACu@NBC.



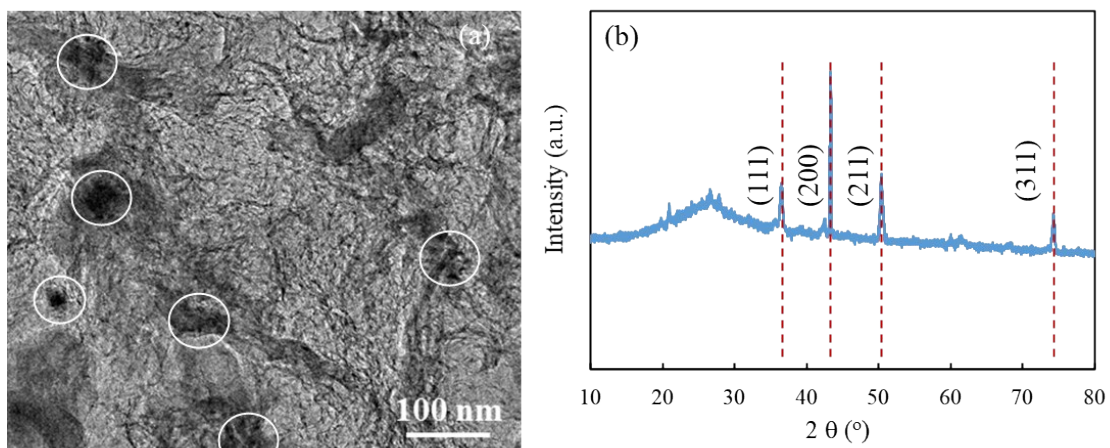

Fig. S4 The TEM image and wide-angle XRD pattern of the Cu@BC.

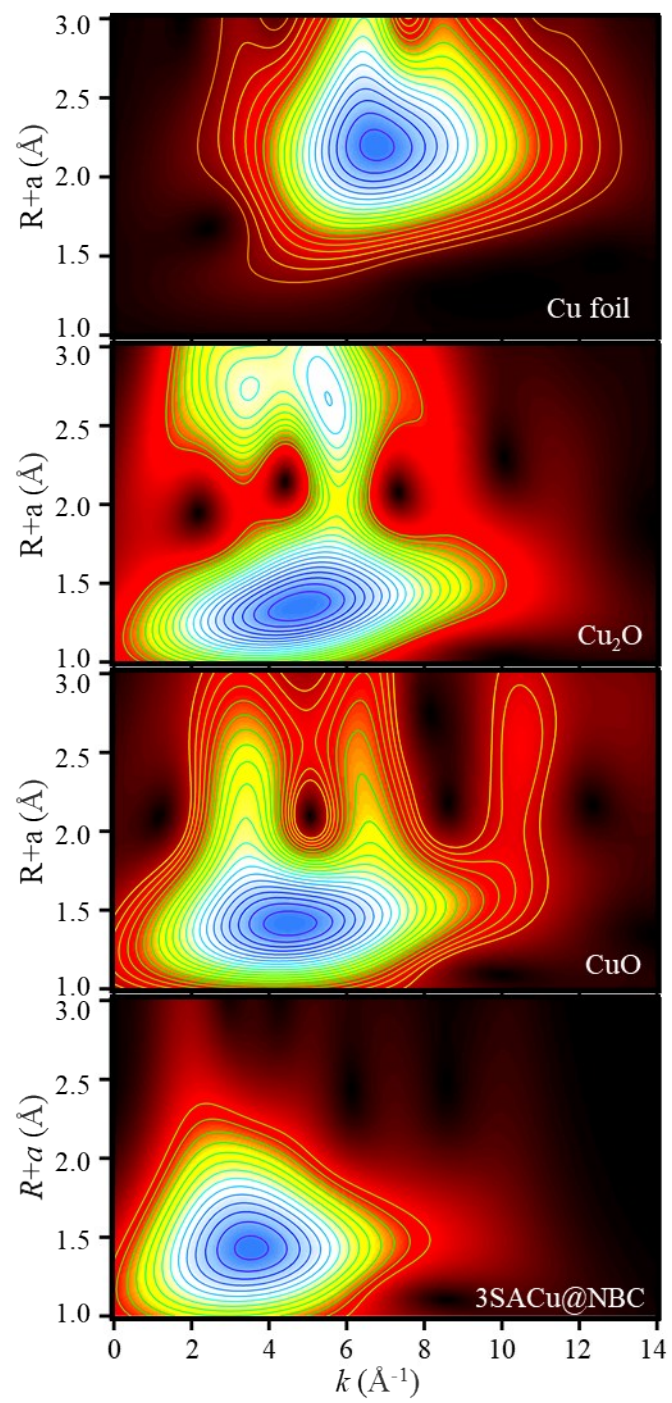

Fig. S5 WT plot of 3SACu@NBC.

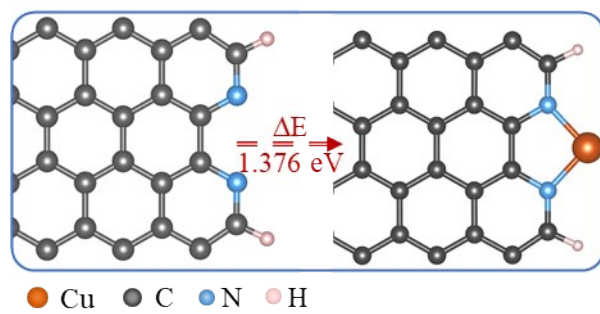

Fig. S6 The formation energies of Cu-N<sub>2</sub>.

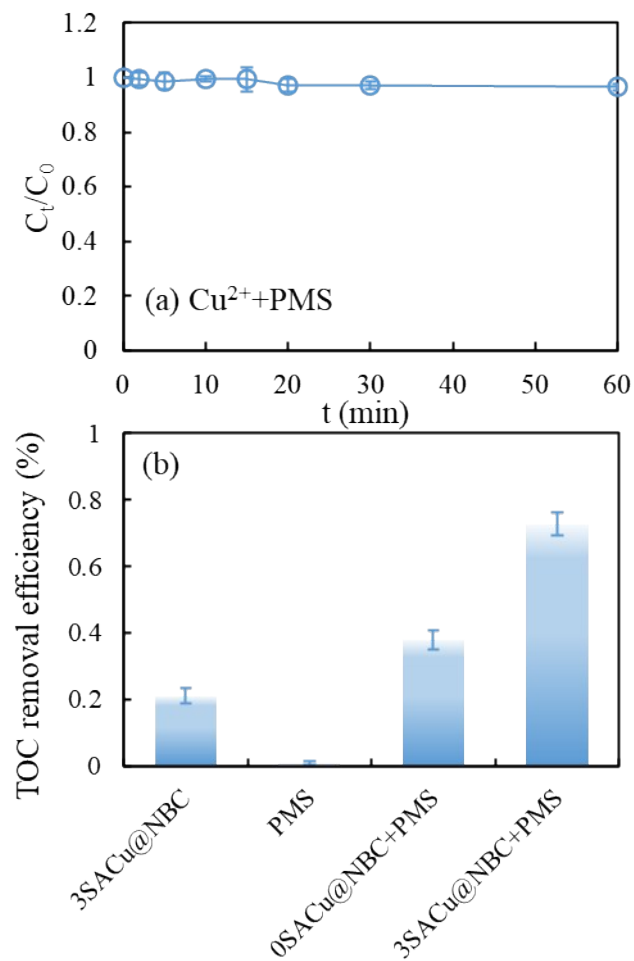

Fig. S7 (a) BPA removal in  $\text{Cu}^{2+}$ /PMS system ( $[\text{Cu}^{2+}] = 0.01$  mg/L,  $[\text{BPA}] = 20$  mg/L,  $[\text{PMS}] = 0.4$  g/L,  $T = 25$  °C); (b) TOC removal efficiencies during BPA degradation in different system ( $[\text{catalysts}] = 0.1$  g/L,  $[\text{BPA}] = 20$  mg/L,  $[\text{PMS}] = 0.4$  g/L,  $T = 25$  °C,  $\text{pH}=7$ ).

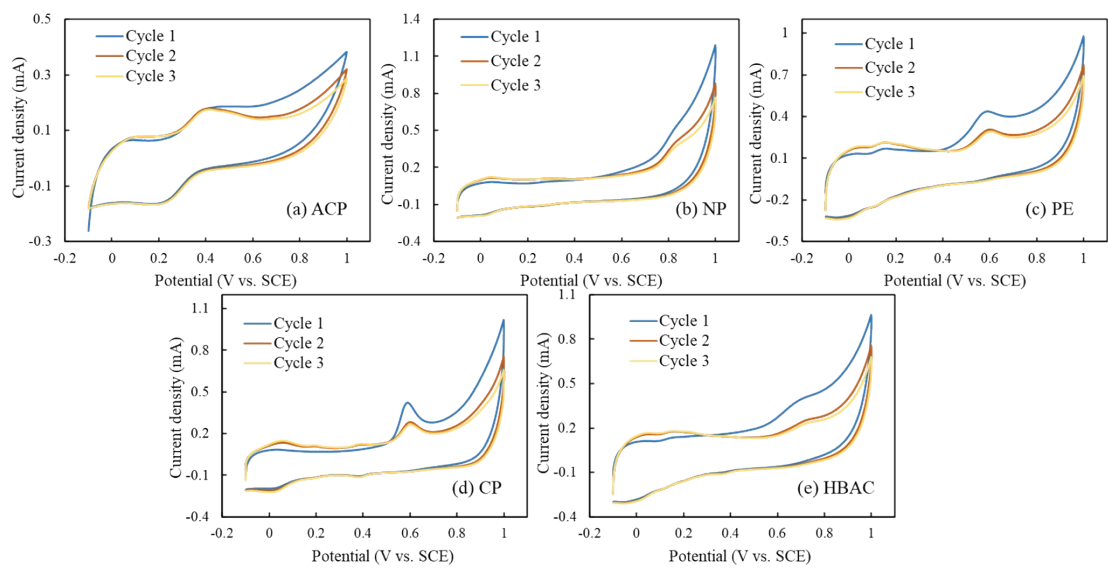

Fig. S8 CV curves on the graphite electrodes in (a) ACP, (b) NP, (c) PE, (d) CP and (d) HBAC solutions. ( $[\text{organics}]_0 = 0.05 \text{ mM}$ ,  $[\text{PBS}] = 20 \text{ mM}$ ).

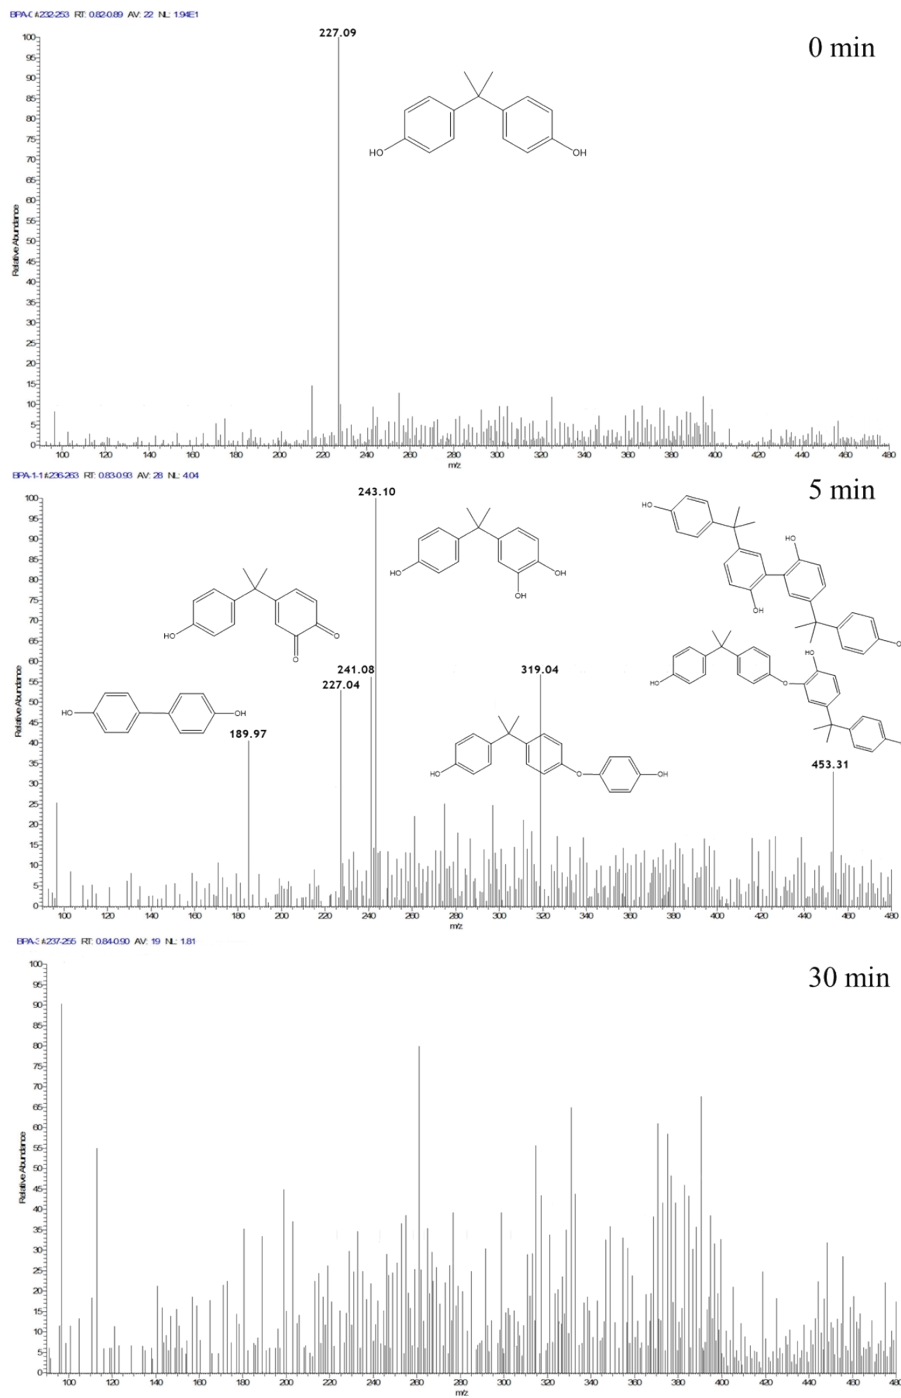

Fig. S9 LC-MS of BPA and intermediates in 3SACu@NBC/PMS system at different time.

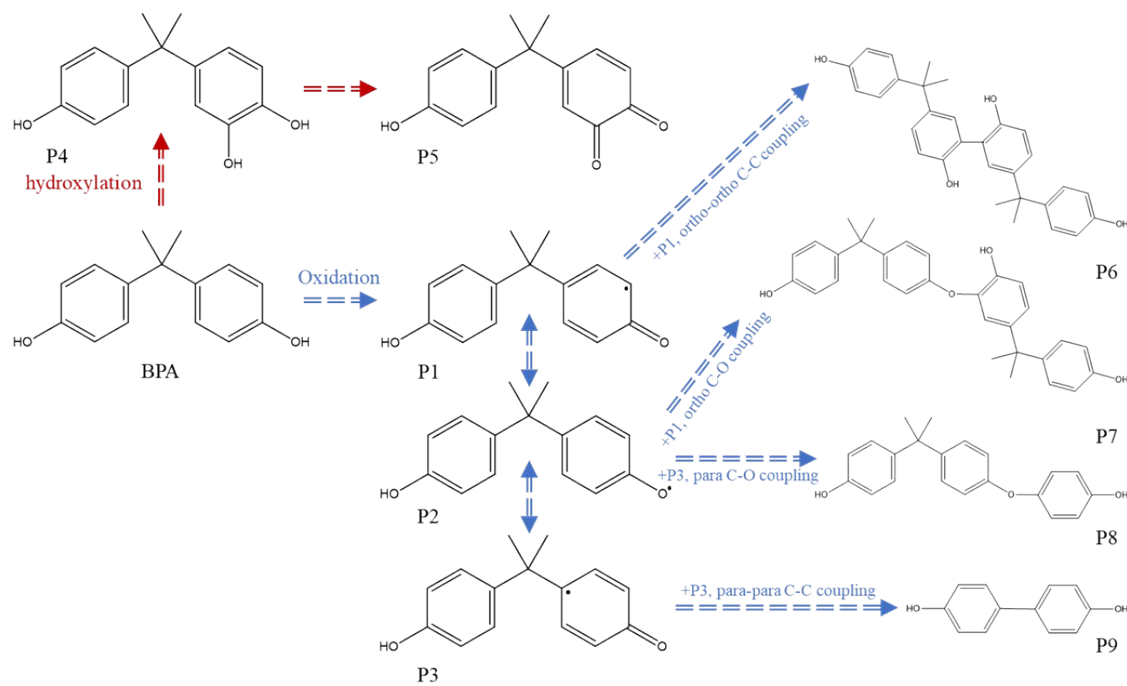

Fig. S10 Proposed transformation pathways of BPA in 3SACu@NBC/PMS system.

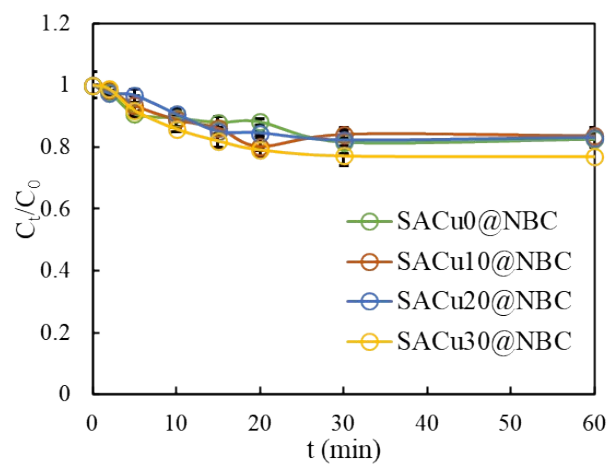

Fig. S11 BPA adsorption by different SACu@NBC catalysts ( $[\text{SACu@NBC}] = 0.1 \text{ g/L}$ ,  $[\text{PMS}] = 0.4 \text{ g/L}$ ,  $[\text{BPA}]_0 = 20 \text{ mg/L}$ ,  $T = 25 \text{ }^\circ\text{C}$ , and  $\text{pH} = 7.0$ ).



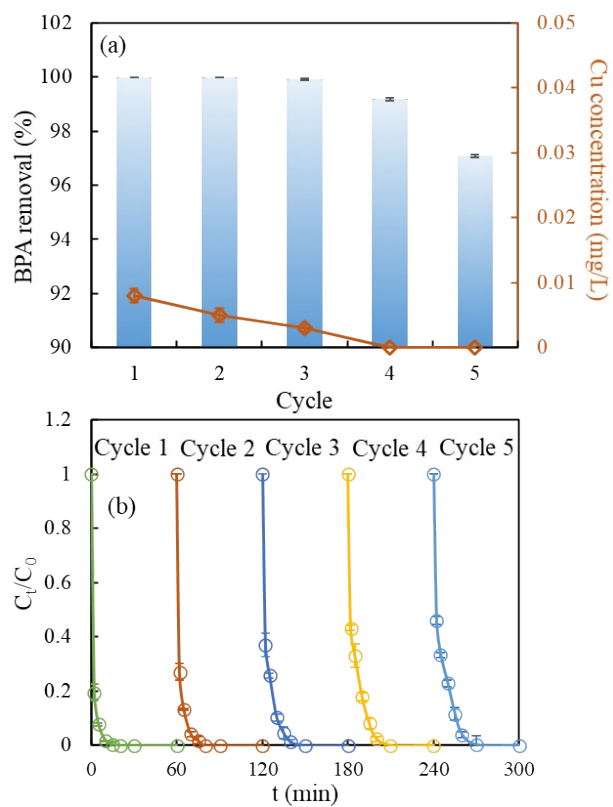

Fig. S12 Catalyst recyclability of 3SACu@NBC ([PMS]=0.4 g/L, [BPA]<sub>0</sub>=20 mg/L, T=25 °C, and pH=7.0).

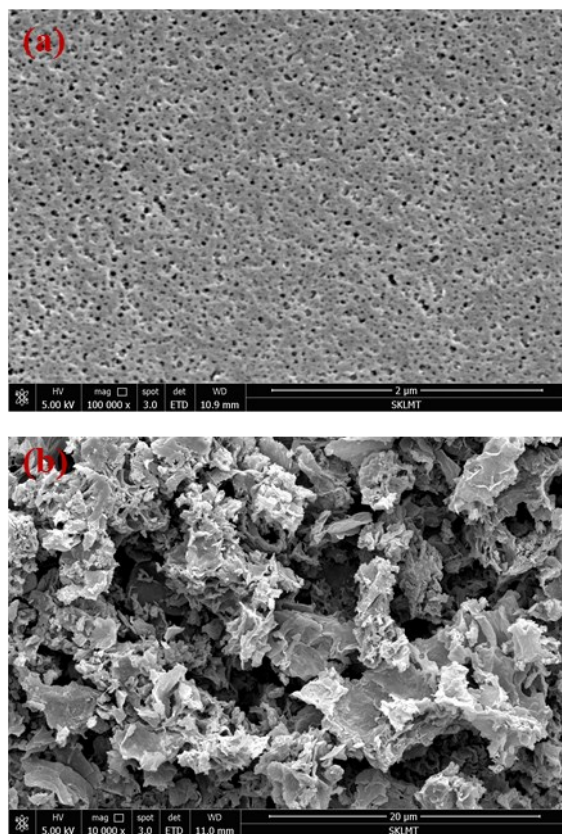

Fig. S13 Scanning electron microscope (SEM) images of the top-sections of (a) PSF and (b) SACu@NBC/PSF membrane.

**Table S1.** EXAFS fitting parameters at the Cu K-edge for various samples ( $S_0^2=0.8$ )

| Sample            | Shell | N               | $\Delta E$ (eV) | R ( $\text{\AA}$ ) | $\sigma^2$ ( $\text{\AA}^2$ ) | R-factor |
|-------------------|-------|-----------------|-----------------|--------------------|-------------------------------|----------|
| Cu foil           | Cu-Cu | 12              | 3.60 $\pm$ 0.58 | 2.538 $\pm$ 0.003  | 0.00848 $\pm$ 0.0005          | 0.004    |
| Cu <sub>2</sub> O | Cu-O  | 2               | 6.24 $\pm$ 1.23 | 1.852 $\pm$ 0.0515 | 0.00508 $\pm$ 0.0023          | 0.006    |
|                   | Cu-Cu | 12              | 6.24 $\pm$ 1.23 | 3.023 $\pm$ 0.0842 | 0.0114 $\pm$ 0.0023           |          |
| CuO               | Cu-O  | 4               | 2.23 $\pm$ 0.26 | 1.943 $\pm$ 0.013  | 0.0040 $\pm$ 0.0012           | 0.012    |
| 3SACu@NBC         | Cu-N  | 4.26 $\pm$ 0.16 | 4.73 $\pm$ 0.46 | 1.923 $\pm$ 0.003  | 0.0111 $\pm$ 0.0008           | 0.0006   |

Note: N: coordination number;  $\Delta E$ : the edge-energy shift; R: the internal atomic distance;  $\sigma^2$ : Debye–Waller factor.

**Table S2.** Specific HPLC conditions for different organic compounds.

| Chemical              | Mobile phase |                       | Flow rate /mL<br>min <sup>-1</sup> | Wavelength<br>/nm |
|-----------------------|--------------|-----------------------|------------------------------------|-------------------|
|                       | Methanol /%  | Water /% <sup>a</sup> |                                    |                   |
| Bisphenol A           | 70           | 30                    | 1.0                                | 280               |
| Phenol                | 50           | 50                    | 1.0                                | 270               |
| 4-chlorophenol        | 70           | 30                    | 1.0                                | 280               |
| 4-nitrophenol         | 70           | 30                    | 1.0                                | 280               |
| Acetaminophen         | 20           | 80                    | 1.0                                | 243               |
| 4-hydroxybenzoic acid | 70           | 30                    | 0.9                                | 254               |

<sup>a</sup> 1% acetic acid

**Table S3.** The catalytic performance comparison in complete BPA degradation.

| Catalyst                           | BPA concentration | Catalyst dosage | Oxidant dosage | Time    | Ref       |
|------------------------------------|-------------------|-----------------|----------------|---------|-----------|
| NGC 700                            | 20 mg/L           | 0.1 g/L         | PMS, 0.2 g/L   | 6 min   | 3         |
| NBC-1000                           | 5 mg/L            | 0.2 g/L         | PMS, 0.3 g/L   | >60 min | 4         |
| Fe@CNs                             | 20 mg/L           | 0.1 g/L         | PDS, 0.5 mM    | 60 min  | 5         |
| Fe <sub>SA</sub> -N-C-20           | 20 mg/L           | 0.15 g/L        | PMS, 0.4 g/L   | 30 min  | 6         |
| La <sub>2</sub> CuO <sub>4.8</sub> | 0.05 mM           | 0.5 g/L         | PMS, 2 mM      | 60 min  | 7         |
| Cu@NBC                             | 10 mg/L           | 0.1 g/L         | PDS, 0.2 g/L   | 60 min  | 8         |
| SACu@NBC                           | 20 mg/L           | 0.1 g/L         | PMS, 0.4 g/L   | 30 min  | This work |

**Table S4.** Band gaps of NBC and 3SACu@NBC.

| Sample   | Band gap (eV) |
|----------|---------------|
| NBC      | 0.451         |
| SACu@NBC | 0.282         |

**Table S5** Characteristics of simulated simulate polycarbonate wastewater treatment.

| Parameter                                   | Value       | Unit  |
|---------------------------------------------|-------------|-------|
| BPA (Bisphenol A)                           | 50          | mg/L  |
| COD (Chemical oxygen demand)                | 293.4 ± 38  | mg/L  |
| TOC (Total organic carbon)                  | 111.3 ± 15  | mg/L  |
| HCO <sub>3</sub> <sup>-</sup> (Bicarbonate) | 10000       | mg/L  |
| Cl <sup>-</sup> (Chlorides)                 | 14000       | mg/L  |
| Conductivity                                | 30300 ± 230 | μS/cm |
| pH (25 °C)                                  | 8.0 ± 0.2   | –     |
| Turbidity                                   | 20.2 ± 2    | NTU   |
| Appearance                                  | tawny       | –     |

## Reference

1. W. Li, X. Li, J. Yu, J. Liao, B. Zhao, L. Huang, A. Ali, H. Zhang, J. H. Wang, Z. Guo and M. Liu, *Nano Energy*, 2019, **61**, 594-603.
2. C. Chen, T. Ma, Y. Shang, B. Gao, B. Jin, H. Dan, Q. Li, Q. Yue, Y. Li, Y. Wang and X. Xu, *Appl. Catal., B*, 2019, **250**, 382-395.
3. R. Luo, M. Li, C. Wang, M. Zhang, M. A. Nasir Khan, X. Sun, J. Shen, W. Han, L. Wang and J. Li, *Water Res.*, 2019, **148**, 416-424.
4. W.-D. Oh, G. Lisak, R. D. Webster, Y.-N. Liang, A. Veksha, A. Giannis, J. G. S. Moo, J.-W. Lim and T.-T. Lim, *Appl. Catal., B*, 2018, **233**, 120-129.
5. L. Liu, X. Xu, Y. Li, R. Su, Q. Li, W. Zhou, B. Gao and Q. Yue, *Chem. Eng. J.*, 2020, **382**.
6. Y. Li, T. Yang, S. Qiu, W. Lin, J. Yan, S. Fan and Q. Zhou, *Chem. Eng. J.*, 2020, **389**.
7. H. Chen, Y. Xu, K. Zhu and H. Zhang, *Appl. Catal., B*, 2021, **284**.
8. J. Pan, B. Gao, Y. Gao, P. Duan, K. Guo, M. Akram, X. Xu and Q. Yue, *Chem. Eng. J.*, 2021, DOI: 10.1016/j.cej.2021.129441.
